# Supplementary material
Source: ML conference proceedings conference paper supplement (https://openreview.net/forum?id=ARJG1kr8A7)
Supplement: supplementary_material [file attachment]

## 407 A Appendix

### 408 A.1 GPT as a machine language: Prompting to interpret/compile a program.

409 A general-purpose computer can execute algorithms that convert the text of a program into its machine  
410 code. Analogously, we can design prompts with instructions on how to turn code in some language  
411 into execution paths that can then be used in prompting.

412 An example is shown in Prompt [A.2](#) (Appendix), where several examples of hypothetical syntax for  
413 transforming states are given, including setting values of variables and matrices, printing them, a  
414 single loop program execution, and the `detailed_max` function that breaks down steps and explains  
415 them. Then, the double loop dynamic programming algorithm for finding the longest common  
416 subsequence (LCS) is also presented in this new language. This prompt successfully triggers the  
417 correct execution of the algorithm, complete with detailed explanations and state transitions (green  
418 shaded in Prompt [A.3](#)). This can then be used as a prompt to execute the LCS algorithm on arbitrary  
419 inputs (Section 3). We should note that GPT-3 is still sensitive to small alterations in text, and Prompt  
420 [A.2](#) does not always lead to good interpretations of the algorithm. The performance may depend on  
421 accidental deceptive patterns and inconsistencies in the prompt, as well as the input. Nevertheless,  
422 once the output has been verified as correct, the Prompt [A.2](#) together with the response in Prompt  
423 [A.3](#) became the prompt – IRSA ‘machine code’ for GPT – to execute (mostly correctly) the LCS  
424 algorithm for new inputs, as long as they are appended in the same format:

```
425 LCS:  
426 Input: <seq1> <seq2> End of input  
427 LCS Prep:
```

### 428 A.2 The longest substring without repeating characters

429 To solve the longest substring without repeating characters problems with basic IRSA, we developed  
430 Prompt [A.5](#) based on the 1-index version of the following single-pass algorithm. Interestingly, this  
431 algorithm trades computation for memory by creating one variable per unique letter in the sequence  
432 for storing the location where the letter was last seen in the sequence during the pass (`last_ind`):

```
433 # s contains the given string  
434 last_ind = {}  
435 m_len = 0  
436  
437 # window start  
438 st_ind = 0  
439  
440 for i in range(0, len(s)):  
441     if s[i] in last_ind:  
442         st_ind=max(st_ind,last_ind[s[i]]+1)  
443  
444     # Update result if window is longer  
445     m_len = max(m_len, i-st_ind + 1)  
446  
447     # Update last index of the character  
448     last_ind[s[i]] = i  
449 return m_len
```

#### 450 A.2.1 Balanced parentheses

451 To address the parentheses problem, we used the single execution path that demonstrates stack  
452 operations for determining whether the sequence is balanced or not. The beginning and the end  
453 are shown in Prompt [A.6](#). For brevity, we have omitted certain portions (represented by ellipses).  
454 Note that creating long prompts is made easier by GPT’s completion capabilities, i.e., by starting  
455 with a description of a few steps and asking the model to finish it. Wherever we want the prompt to  
456 differ from the model’s guess, we erase the generated text from that point and continue typing our  
457 correction/instruction and try to autocomplete again. (See also Sections [A.3](#) [A.1](#) in the Appendix).  
458 But interestingly, as discussed in Section [2.2](#) on fragmented prompting, parts of the execution paths

459 can be omitted: Prompt [A.6](#) as is, with the ellipsis instead of 10 steps in the algorithm, still achieves  
460 91% accuracy!

### 461 **A.3 Full discussion section**

462 Iteration by Regimenting Self-Attention (IRSA) is a technique for *triggering code execution in GPT-3*  
463 *models*. Note that the goal is different from the goal of Alphacode [\[13\]](#) and Copilot [\[4, 25\]](#), which are  
464 meant to *write* the code, without necessarily understanding what it outputs. While there are indeed  
465 examples of rather impressive code generation and even, anecdotally, execution path generation  
466 using minimal prompting in the latest Codex and GPT-3 models, the lack of control in current LLMs  
467 prevents the consistent achievement of these feats with precision, which is why the code generation  
468 applications involve humans in the loop. For instance, as illustrated in zero-shot bubble sort code  
469 Prompt [A.8](#), when relying on Codex alone to attempt code execution, the generated samples are  
470 intuitively close to the correct solution, but a bit off, preventing correct execution. IRSA, on the other  
471 hand, can produce consistently accurate outputs.

472 In algorithm design, trading computation for memory use is a recurrent idea. IRSA as a technique for  
473 LLM inference can be seen in a similar light: We could train a bigger model on more data, with atten-  
474 tion spanning deeper into the past tokens, hoping that it could answer a simple yet computationally  
475 complex query in just a couple of tokens directly; or we can devise a prompting strategy instructing  
476 a smaller LLM to use its token stream as a memory tape, allowing it to reach similar functionality  
477 with increased token usage. By triggering and controlling iterative behaviour, we can, in principle,  
478 execute arbitrary algorithms, which further raises interesting questions: What are the consequences  
479 of LLMs becoming Turing-complete? And how difficult is it to program via IRSA? Will larger GPT  
480 models become capable of executing programs correctly without IRSA? Based on our experience in  
481 designing the prompts we showed here, we speculate on these three questions in this section.

#### 482 **A.3.1 Possible consequences**

483 **(Teaching) Coding.** The integration of LLMs’ code generation capabilities with IRSA leads to  
484 innovative applications in code generation. Some of it is implied in the interpreter/compiler Prompt  
485 [A.2](#), which instructs GPT how to interpret and execute code. Following these ideas, exploring program  
486 verification and automatic debugging could be a promising direction. Another obvious application  
487 of IRSA is in computer science education, where we often expect students to execute programs on  
488 paper to determine what the state will be at some point during the execution. Furthermore, IRSA may  
489 also point to new ways of programming by example.

490 **Adversarial applications.** Any time a computational medium is Turing-complete, a variety of  
491 malicious uses may become possible, such as creating and executing malware, exploiting system  
492 vulnerabilities, conducting cryptographic attacks, causing resource exhaustion, etc. Thus we should  
493 be aware of the double-edged sword with the increased versatility and computational power of GPT  
494 models.

495 **In-context learning and LLM evaluation.** Prompting with IRSA must be considered a zero- or  
496 one-shot learning technique, analogous to chain-of-thought prompting. If, via IRSA, LLMs can  
497 be disciplined with a regimented prompt to execute arbitrary algorithms involving (double) loops,  
498 they may be able to solve arbitrary problems NLP researchers can compose, incorporating natural  
499 language understanding and iterative reasoning like belief propagation, constraint satisfaction, search,  
500 etc. This renders many of the hard BIG-bench tasks easier than they initially appear, as already  
501 suggested by [\[33\]](#) using classical CoT prompting. Many CoT results can be further improved with  
502 IRSA (as logical deductions with Prompt [2](#)).

503 However, triggering such iterative behaviour may still be hampered by the same sensitivity of in-  
504 context learning to accidental misleading patterns, already observed in classical prompting [\[16, 41\]](#),  
505 where there may exist a “fantastical” crafting of the prompt that significantly improves the accuracy  
506 of the task. In fact, iterative reasoning may further amplify the fantastical choices. Thus, if one LLM  
507 successfully solves a hard logical reasoning task using a suitable prompt while another does not, this  
508 might imply that the optimal prompt has not yet been found. In fact, it would not be surprising if  
509 better prompts are eventually found that enable the LLM we used here (GPT-3, CODE-DAVINCI-002)  
510 to solve all tasks with 100% accuracy. Thus, evaluating LLMs on their in-context learning abilities is

511 of questionable value: Some of the hard tasks in BIG-bench may be better suited to evaluating the  
512 skills of prompt engineers rather than the LLMs themselves.

513 **Hybrid models – LLMs as translators.** If LLMs are Turing-complete and can transform problems  
514 described in natural language into algorithmically solvable programs, the decision to let them execute  
515 the program or not becomes a practical matter of computational cost. With the apparent magic of  
516 savant-like guessing gone, it is much more practical to run the algorithms on a classical computer,  
517 an approach taken by, for example, [22] where the external computational mechanism performs  
518 probabilistic inference, or [10] that involves external control flows, and many other recent published  
519 and unpublished experiments combining LLMs with external calls and tools [24, 7, 39, 26, 28, 23].  
520 Such hybrid models could separate the higher level reasoning “System 2” – to use an analogy with  
521 models of human cognitive processes [35, 9] – from the lower-level “knee-jerk reaction” reasoning  
522 “System 1”, however savant-like it might be. In such systems, LLMs can dramatically improve  
523 traditional artificial intelligence algorithms simply by translating the problems into an appropriate  
524 form: see Prompt A.7 where the logical deduction task is solved by creating a call to the `Solve`  
525 command in Wolfram language (Mathematica) for an example. The artificial intelligence community  
526 is increasingly interested in researching such systems, e.g., [11, 8], and the developer community is  
527 already developing and deploying hybrid language models (Bing-ChatGPT integration, for instance).

528 **Self-attention control in training and inference.** To paraphrase an old adage on parenting, re-  
529 searchers have spent a lot of effort teaching GPTs to pay attention to everything in the text, and  
530 now IRSA is an attempt to stop it from attending to everything. We accomplish it both by drawing  
531 attention with a strong repetitive structure and by brute force through skip attention (Section 2.3).  
532 More flexible ways of determining what the model should attend to may be needed both in model  
533 building and inference.

### 534 A.3.2 Pitfalls of programming in GPT-3

535 Prompts we experimented with induce single loop or double loop program execution. Generally,  
536 controlling double loop algorithms, such as Bubble Sort and Longest Common Subsequence, is more  
537 challenging. The difficulty lies not in understanding the double loop logic, but rather in the increased  
538 probability of running into some of the problems described below. These problems are not always  
539 obvious, but can result in a wide range of accuracies achieved by seemingly similar prompts. For  
540 example, the two prompt designs for Bubble Sort both worked surprisingly well, but showed a big  
541 gap in performance between them (74% and 100%). Here are some tips for attempting IRSA.

542 **Keep a complete state.** While it is often possible to instruct by analogy without fully accounting  
543 for all decisions, keeping the full state (i.e., showing it repeatedly after each transition) is usually  
544 preferable. For example, Prompt 3 contains the iterator variable in the state, while Prompt 1 does not.  
545 Not only does keeping full state help regiment the attention, but it makes fragmented prompting and  
546 skip-to-state attention possible.

547 **Explain why before the instruction, not after.** LLMs are autoregressive, which makes  
548 them easier to prompt in order: from left to right. Thus, instead of instructing with  
549 ‘We now swap 4 and 2 because  $2 < 4$ ’, we instruct with:

550 Because  $4 < 2$  is false we swap 4 and 2

551 Then later in generation, e.g., ‘Becasue  $5 < 3$  is’ will trigger generation of token false and it, in  
552 turn, will trigger generation of ‘we swap’, and so on.

553 **Avoid unnecessary variation, follow strong structure.** We used the term *regimenting* attention in  
554 the naming of the technique to emphasize that strong structure is even more important in IRSA than in  
555 other prompting applications. It is usually crucial to order the variables in the state always in the same  
556 order, utilize the same keywords to designate the state, use the same language to explain the transitions,  
557 and ensure consistent capitalization, punctuation, and even spacing/tabulation. We experimented with  
558 several variants of the Bubble Sort prompt, and even when using the same worked-out example, the  
559 accuracy can vary dramatically.

560 **Generate as much of the prompt with LLM itself.** One way to create such a strong structure is  
561 to let the model continue the prompt we are designing after every few lines (going back to correct  
562 the incorrectly generated continuation). The model is more likely to stay faithful to the pattern  
563 human started than the human is (with spacing, typos, and so on). Because of this, using the

564 interpreter/compiler Prompt [A.2](#) to create an LCS execution path to serve as a prompt is a safer way  
565 of generating an IRSA-inducing prompt (as long as we verify that the exemplary execution path is  
566 correct).

567 **Overlapping patterns can be problematic.** When generating the next token, an LLM has to bal-  
568 ance many influences of patterns both in the prompt and the so-far generated text. For example, in  
569 the LCS algorithm execution Prompt [A.3](#), the model has to balance the long-range self-attention  
570 when deciding the next token after  $C[1, 1] =$  with the short-range influences, which make the to-  
571 ken 1 most likely after two 1s in a row regardless of the longer context. At times, short-range  
572 influences prevail and cause an incorrect execution. But, long-range self-attention can also inap-  
573 propriately overrule correct short-range reasoning. For instance, when generating based on the  
574 Bubble Sort Prompt [3](#), the model generates repetitive text that includes many statements of the form  
575 ‘Because  $n < m$  is true/false ...’, which can create strong pattern overruling local evaluation  
576 of the next inequality. To demonstrate that, we evaluated the likelihood of the next token after  
577 ‘Because  $2 < 1$  is’ for different lengths of context preceding this text. The context had between  
578 1 and 15 lines of text in the form ‘Because  $2 < m$  is true we ...’ with  $m \in [3..9]$  randomly  
579 chosen, e.g.

```
580 Because 2<3 is true we ...  
581 Because 2<7 is true we ...  
582 Because 2<5 is true we ...  
583 Because 2<1 is
```

584 As we show in Fig [A.1](#) although the preceding context is correct when evaluating the inequalities, the  
585 log odds of an incorrect evaluation of  $2 < 1$  increase by over six orders of magnitude with the length of  
586 this context. The longer this context is, the more it reinforces the pattern ‘Because  $2 < \dots$  true’:  
587 If 2 was smaller than a variety of numbers, then it is smaller than 1, too! Furthermore, there is a  
588 large variation due to the random selection of  $m$  in the examples in the context, indicating a variety  
589 of other patterns that drive the generation (The figure shows the band between the maximum and  
590 minimum log odds over 20 runs). For the contexts of length 7 the odds of picking true over false  
591 become roughly even. IRSA can drive probabilities to be so taut that rerunning the same API call  
592 with zero temperature can sometimes return a different result (The code behind the API presumably  
593 always adds a very small constant to log probabilities before sampling). Skip-to-state strategy in  
594 Section [2.3](#) is thus less sensitive to patterns that result from program execution.

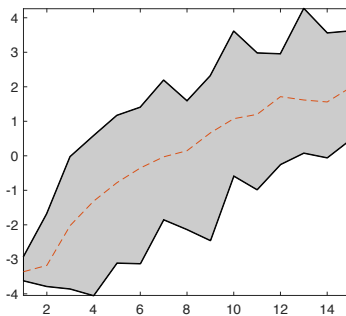

Figure A.1: The difference between GPT Codex log probabilities of tokens true and false after ‘Because  $2 < 1$  is’, which was preceded by a long context of variable length (x-axis). The context contains between 1 and 15 lines of text comparing number 2 with randomly chosen *larger* numbers and declaring, e.g., ‘Because  $2 < 6$  is true ...’. We show the band between the maximum and minimum log odds over 20 trials, as well as the mean of the difference. When the preceding context does not have too many comparisons of 2 with larger numbers, the model overwhelmingly prefers the correct evaluation false, but when the context is longer than 7 statements, the model usually prefers true.

595 This fragility further emphasizes the difficulty in evaluating LLMs on in-context learning tasks:  
596 Improving accuracy may simply be a matter of spending more time designing a prompt (becoming a  
597 GPT whisperer). Still, getting GPT to execute the algorithms studied here was not excessively hard,  
598 and it may even become easier on newer models.

### 599 A.3.3 And what about GPT-4?

600 A recent qualitative analysis of GPT-4 abilities [3] includes one example of detailed execution of a  
601 Python program for one input (in their Fig. 3.7). The LCS algorithm is well-known, so would the  
602 newer and better GPT-4 model execute it correctly and consistently across different inputs? In Prompt  
603 A.10 we show a prompt that simply asks GPT-4 to show the LCS algorithm, execute it, and report the  
604 result. On our LCS-S dataset, using this prompt design and sampling with zero temperature, GPT-4  
605 gets the correct answer 49% of the times, just slightly better than the 'Guessing' baseline (Table 1).  
606 An alternative prompt shown in Prompt A.11, asks for intermediate steps of execution to be shown  
607 before the answer is generated, moving the prompting strategy closer to IRSA. This prompt can be  
608 thought of as a version of Prompt A.2 but lighter and more straightforward, expecting GPT-4 to be  
609 able to show program execution without strict specifications. This prompt leads to the accuracy of  
610 69% on LCS-S, still behind IRSA result with codex (93%, Table 2). To illustrate why this may be,  
611 in Prompt A.12 we show the same prompt asking for intermediate steps, but for a different input.  
612 The inputs in Prompts A.11 and A.12 were processed differently, even though everything else in the  
613 prompts was the same, and API calls were made with zero temperature. In one case, only the initial  
614 and end states of the "dp" matrix are shown, while in the other, several steps (but not all!) are shown.  
615 Therefore, it seems that GPT-4 is still hard to control without regimenting self-attention more strictly.

### 616 A.4 Full set of prompts

617 Here we list the prompts used in all tasks and discussed above. The caption of each prompt contains  
618 a saved link to the OpenAI playground.

---

**Prompt A.1.** Response (shaded green) to Prompt **1**, whose ending part is shown.

---

```
...
    State: a=[1 2 3 5], n_swaps=2, swap_flag=false EndState
    swap_flag is false, so stop the iteration
Final List: 1, 2, 3, 5
Number of swaps: 2
END OF EXECUTION
```

```
Problem: 0, 3, 8, 5, 6
EXECUTION
```

```
Prep
Length of the list: 5
Number of consecutive pairs: 4
a=[0 3 8 5 6]
set n_swaps=0
EndPrep
Iteration:
    set swap_flag=false. The state is:
    State: a=[0 3 8 5 6], n_swaps=0, swap_flag=false EndState
    Pair a[1,2] = [0 3] Check if 0<3. Is it true? Yes.
        Because of that, we leave state as is
    State: a=[0 3 8 5 6], n_swaps=0, swap_flag=false EndState
    Pair a[2,3] = [3 8] Check if 3<8. Is it true? Yes.
        Because of that, we leave state as is
    State: a=[0 3 8 5 6], n_swaps=0, swap_flag=false EndState
    Pair a[3,4] = [8 5] Check if 8<5. Is it true? No.
        Thus, we set swap_flag=true, increase n_swaps by one,
        and in the latest a=[0 3 8 5 6]
        swap 8 and 5 to get into state:
    State: a=[0 3 5 8 6], n_swaps=1, swap_flag=true EndState
    Pair a[4,5] = [8 6] Check if 8<6. Is it true? No.
        Thus, we set swap_flag=true, increase n_swaps by one,
        and in the latest a=[0 3 5 8 6]
        swap 8 and 6 to get into state:
    State: a=[0 3 5 6 8], n_swaps=2, swap_flag=true EndState
    swap_flag is true, so do another iteration
Iteration:
    set swap_flag=false. The state is:
    State: a=[0 3 5 6 8], n_swaps=2, swap_flag=false EndState
    Pair a[1,2] = [0 3] Check if 0<3. Is it true? Yes.
        Because of that, we leave state as is
    State: a=[0 3 5 6 8], n_swaps=2, swap_flag=false EndState
    Pair a[2,3] = [3 5] Check if 3<5. Is it true? Yes.
        Because of that, we leave state as is
    State: a=[0 3 5 6 8], n_swaps=2, swap_flag=false EndState
    Pair a[3,4] = [5 6] Check if 5<6. Is it true? Yes.
        Because of that, we leave state as is
    State: a=[0 3 5 6 8], n_swaps=2, swap_flag=false EndState
    Pair a[4,5] = [6 8] Check if 6<8. Is it true? Yes.
        Because of that, we leave state as is
    State: a=[0 3 5 6 8], n_swaps=2, swap_flag=false EndState
    swap_flag is false, so stop the iteration
Final List: 0, 3, 5, 6, 8
Number of swaps: 2
END OF EXECUTION
```

**Prompt A.2.** Interpreter/Compiler prompt that can execute LCS algorithm. [Playground link \(use 0 temperature\)](#)

```
Matrix C contains values, e.g:
C[0,0]=1 C[0,1]=6 C[0,2]=11 C[0,3]=16 C[0,4]=21
C[1,0]=2 C[1,1]=7 C[1,2]=12 C[1,3]=17 C[1,4]=22

To query a value:
Show(C[1,2])
<state> C[1,2]=12 </state>

Query an undefined variable
Show(a)
<state> a=0 </state>

To set a value:
C[0,1]:=8
C[0,1] was 6. Now C[0,1]=8.
a:=5
a was 0. Now a=5.

To query multiple variables:
Show(a, C[0:1,0:4])
<state>
a=5
C[0,0]=1 C[0,1]=8 C[0,2]=11 C[0,3]=16 C[0,4]=21
C[1,0]=2 C[1,1]=7 C[1,2]=12 C[1,3]=17 C[1,4]=22
</state>

Program:
N:=1
for i from 0 to N
  C[i,i]:=-3
Execute:
i:=0
C[0,0]:=-3
i:=1
C[1,1]:=-3
Finished with i=N, so done with i loop

Show(C)
<state>
C[0,0]=-3 C[0,1]=8 C[0,2]=11 C[0,3]=16 C[0,4]=21
C[1,0]=2 C[1,1]=-3 C[1,2]=12 C[1,3]=17 C[1,4]=22
</state>

Program:
if a<C[0,4]
  C[0,0]:=5
else
  C[0,1]:=2
Execute:
Check if a<C[0,4]? a is 5 C[0,4] is 8 Is 5<8?...
... Yes. C[0,0]:=5
Done

Show(C[0,0])
<state> C[0,0]=5 </state>

Program:
C[0,2]:=detailed_max(C[0,3],C[0,4])
Execute:
C[0,3] is 16, C[0,4] is 21. C[0,2] is the greater of...
...them. C[0,2]:=21
Done

LCS:
Input: TA ATA End of input
LCS Prep:
a[1]=T a[2]=A
b[1]=A b[2]=T b[3]=A
M=2 N=3

LCS program:
Show(a,b,M,N)
for i from 1 to M
  for j from 1 to N
    if a[i]==b[j]
      C[i,j]:=C[i-1,j-1]+1
    else
      C[i,j]:=detailed_max(C[i,j-1],C[i-1,j])
  Show(i, j, M, N, C[0:i,0:N])
Show('END')
Execute:
```

**Prompt A.3.** In response to Prompt [A.2](#), the model returns the correct LCS execution path shown here

Execute:

```
<state>
a[1]=T a[2]=A
b[1]=A b[2]=T b[3]=A
M=2 N=3
</state>
i:=1
j:=1
Check if a[1]==b[1]? a[1] is T b[1] is A Is T==A?...
... No. C[1,1]:=detailed_max(C[1,0],C[0,1])
... C[1,0] is 0, C[0,1] is 0. C[1,1] is the greater of
...them. C[1,1]:=0
<state>
i=1 j=1 M=2 N=3
C[0,0]=0 C[0,1]=0 C[0,2]=0 C[0,3]=0
C[1,0]=0 C[1,1]=0 C[1,2]=0 C[1,3]=0
</state>
j:=2
Check if a[1]==b[2]? a[1] is T b[2] is T Is T==T?...
... Yes. C[1,2]:=C[0,1]+1
... C[0,1] is 0. C[1,2]:=1
<state>
i=1 j=2 M=2 N=3
C[0,0]=0 C[0,1]=0 C[0,2]=0 C[0,3]=0
C[1,0]=0 C[1,1]=0 C[1,2]=1 C[1,3]=0
</state>
j:=3
Check if a[1]==b[3]? a[1] is T b[3] is A Is T==A?...
... No. C[1,3]:=detailed_max(C[1,2],C[0,3])
... C[1,2] is 1, C[0,3] is 0. C[1,3] is the greater of
...them. C[1,3]:=1
<state>
i=1 j=3 M=2 N=3
C[0,0]=0 C[0,1]=0 C[0,2]=0 C[0,3]=0
C[1,0]=0 C[1,1]=0 C[1,2]=1 C[1,3]=1
</state>
i:=2
j:=1
Check if a[2]==b[1]? a[2] is A b[1] is A Is A==A?...
... Yes. C[2,1]:=C[1,0]+1
... C[1,0] is 0. C[2,1]:=1
<state>
i=2 j=1 M=2 N=3
C[0,0]=0 C[0,1]=0 C[0,2]=0 C[0,3]=0
C[1,0]=0 C[1,1]=0 C[1,2]=1 C[1,3]=1
C[2,0]=0 C[2,1]=1 C[2,2]=0 C[2,3]=0
</state>
j:=2
Check if a[2]==b[2]? a[2] is A b[2] is T Is A==T?...
... No. C[2,2]:=detailed_max(C[2,1],C[1,2])
... C[2,1] is 1, C[1,2] is 1. C[2,2] is the greater of
...them. C[2,2]:=1
<state>
i=2 j=2 M=2 N=3
C[0,0]=0 C[0,1]=0 C[0,2]=0 C[0,3]=0
C[1,0]=0 C[1,1]=0 C[1,2]=1 C[1,3]=1
C[2,0]=0 C[2,1]=1 C[2,2]=1 C[2,3]=0
</state>
j:=3
Check if a[2]==b[3]? a[2] is A b[3] is A Is A==A?...
... Yes. C[2,3]:=C[1,2]+1
... C[1,2] is 1. C[2,3]:=2
<state>
i=2 j=3 M=2 N=3
C[0,0]=0 C[0,1]=0 C[0,2]=0 C[0,3]=0
C[1,0]=0 C[1,1]=0 C[1,2]=1 C[1,3]=1
C[2,0]=0 C[2,1]=1 C[2,2]=1 C[2,3]=2
</state>
<state>
END
</state>
```



---

**Prompt A.4.** Full single path execution path prompt using the state description as in the fragmented Prompt 3 [Playground link \(use with 0 temperature\)](#)

---

Problem: 2, 3, 1, 5

EXECUTION

Length of the list: L=4

Number of pairs: P=3

a=[2 3 1 5]

set n\_swaps=0. set i=P=3. set swap\_flag=true.

<state> a=[2 3 1 5] i=3 P=3 n\_swaps=0 swap\_flag=true </state>

Since i=3 and P=3, i and P are equal, so this iteration is done, but swap\_flag is true, so we need another iteration

Iteration:

set swap\_flag=false. set i=0. The state is:

<state> a=[2 3 1 5] i=0 P=3 n\_swaps=0 swap\_flag=false </state>

Since i=0 and P=3, these two are different, so we continue

a[i]=a[0]=2 a[i+1]=a[1]=3

Because 2<3 is true we keep state as is and move on by increasing i

<state> a=[2 3 1 5] i=1 P=3 n\_swaps=0 swap\_flag=false </state>

Since i=1 and P=3, these two are different, so we continue

a[i]=a[1]=3 a[i+1]=a[2]=1

Because 3<1 is false we set swap\_flag=true, increase n\_swaps by one, and in a=[2 3 1 5] swap 3 and 1, and increase i, and keep P as is to get

<state> a=[2 1 3 5] i=2 P=3 n\_swaps=1 swap\_flag=true </state>

Since i=2 and P=3, these two are different, so we continue

a[i]=a[2]=3 a[i+1]=a[3]=5

Because 3<5 is true we keep state as is and move on by increasing i

<state> a=[2 1 3 5] i=3 P=3 n\_swaps=1 swap\_flag=true </state>

Since i=3 and P=3, these two are equal, so this iteration is done, but swap\_flag is true, so we need another iteration

Iteration:

set swap\_flag=false. set i=0. The state is:

<state> a=[2 1 3 5] i=0 P=3 n\_swaps=1 swap\_flag=false </state>

Since i=0 and P=3, these two are different, so we continue

a[i]=a[0]=2 a[i+1]=a[1]=1

Because 2<1 is false we set swap\_flag=true, increase n\_swaps by one, and in a=[2 1 3 5] swap 2 and 1, and increase i, and keep P as is to get

<state> a=[1 2 3 5] i=1 P=3 n\_swaps=2 swap\_flag=true </state>

Since i=1 and P=3, these two are different, so we continue

a[i]=a[1]=2 a[i+1]=a[2]=3

Because 2<3 is true we keep state as is and move on by increasing i

<state> a=[1 2 3 5] i=2 P=3 n\_swaps=2 swap\_flag=true </state>

Since i=2 and P=3, these two are different, so we continue

a[i]=a[2]=3 a[i+1]=a[3]=5

Because 3<5 is true we keep state as is and move on by increasing i

<state> a=[1 2 3 5] i=3 P=3 n\_swaps=2 swap\_flag=true </state>

Since i=3 and P=3, these two are equal, so this iteration is done, but swap\_flag is true, so we need another iteration

Iteration:

set swap\_flag=false. set i=0. The state is:

<state> a=[1 2 3 5] i=0 P=3 n\_swaps=2 swap\_flag=false </state>

Since i=0 and P=3, these two are different, so we continue

a[i]=a[0]=1 a[i+1]=a[1]=2

Because 1<2 is true we keep state as is and move on by increasing i

<state> a=[1 2 3 5] i=1 P=3 n\_swaps=2 swap\_flag=false </state>

Since i=1 and P=3, these two are different, so we continue

a[i]=a[1]=2 a[i+1]=a[2]=3

Because 2<3 is true we keep state as is and move on by increasing i

<state> a=[1 2 3 5] i=2 P=3 n\_swaps=2 swap\_flag=false </state>

Since i=2 and P=3, these two are different, so we continue

a[i]=a[2]=3 a[i+1]=a[3]=5

Because 3<5 is true we keep state as is and move on by increasing i

<state> a=[1 2 3 5] i=3 P=3 n\_swaps=2 swap\_flag=false </state>

Since i=3 and P=3, these two are equal, so this iteration is done, but swap\_flag is false, so we are done

Final List: 1, 2, 3, 5

Number of swaps: 2

END OF EXECUTION

Problem: 3, 6, 8, 2, 7

EXECUTION

---

**Prompt A.5.** Prompt that triggers execution of the search for the longest substring without repeating characters. [Playground link \(use 0 temperature\)](#)

```
Input: s = c, b, c, a, b, b
START
Unique letters: a, b, c
Define variables last_a=0, last_b=0, last_c=0
Length of sequence s: L=6
Because L is 6, the needed number of iterations is 6
set st_ind=1
st m_len=0
set i=1
Iteration 1:
  s(1) is c, so use last_c
  last_c is 0, so nothing to do here.
  max(m_len, i-st_ind+1) is max(0, 1-1+1) which is...
  ..max(0,1)=1, so we set m_len=1
  since i is 1, and the letter is c, set last_c=1
  increase i by one
  i=2, st_ind=1, m_len=1, last_a=0, last_b=0, last_c=1
End of iteration 1. But we need to do 6 iterations,...
...so we do another one
Iteration 2:
  s(2) is b, so use last_b
  last_b is 0, so nothing to do here.
  max(m_len, i-st_ind+1) is max(1, 2-1+1) which is...
  ..max(1, 2)=2, so we set m_len=2
  since i is 2, and the letter is b, set last_b=2
  increase i by one
  i=3, st_ind=1, m_len=2, last_a=0, last_b=2, last_c=1
End of iteration 2. But we need to do 6 iterations,...
...so we do another one
Iteration 3:
  s(3) is c, so use last_c
  last_c is greater than 0, so we reason...
  ..max(st_ind, last_c+1) is max(1, 2)=2...
  ...so we set st_ind=2
  max(m_len, i-st_ind+1) is max(2, 3-2+1) which is...
  ..max(2, 2)=2, so we set m_len=2
  since i is 3, and the letter s(3) is c, set last_c=3
  increase i by one
  i=4, st_ind=2, m_len=2, last_a=0, last_b=2, last_c=3
End of iteration 2. But we need to do 6 iterations,...
...so we do another one
Iteration 4:
  s(4) is a, so use last_a
  last_a is 0, so nothing to do here.
  max(m_len, i-st_ind+1) is max(2, 4-2+1) which is...
  ..max(2, 3)=3, so we set m_len=3
  since i is 4, and the letter s(4) is a, set last_a=4
  increase i by one
  i=5, st_ind=2, m_len=3, last_a=4, last_b=2, last_c=3
End of iteration 4. But we need to do 6 iterations,...
...so we do another one
Iteration 5:
  s(5) is b, so use last_b
  last_b is greater than 0, so we reason...
  ..max(st_ind, last_b+1) is max(2, 2+1) which is...
  ...max(2, 3)=3 so we set st_ind=3
  max(m_len, i-st_ind+1) is max(3, 5-3+1) which is...
  ..max(3, 3)=3, so we set m_len=3
  since i is 5, and the letter s(5) is b, set last_b=5
  increase i by one
  i=6, st_ind=3, m_len=3, last_a=4, last_b=5, last_c=3
End of iteration 5. But we need to do 6 iterations,...
...so we do another one
Iteration 6:
  s(6) is b, so use last_b
  last_b is greater than 0, so we reason...
  ..max(st_ind, last_b+1) is max(3, 5+1) which is...
  ...max(3, 6)=6 so we set st_ind=6
  max(m_len, i-st_ind+1) is max(3, 6-6+1) which is...
  ..max(3, 1)=3, so we set m_len=3
  since i is 6, and the letter s(6) is b, set last_b=6
  increase i by one
  i=7, st_ind=6, m_len=3, last_a=4, last_b=6, last_c=3
End of iteration 6. We needed to do 6 iterations,...
...so we are done

The solution is: m_len=3
END
```

```
Input: s = p, w, w, k, e, p, z
START
```

---

**Prompt A.6.** Prompt that triggers evaluation of parentheses using a stack. [Full prompt in playground](#) and [Prompt as here \(with 10 steps missing\) in playground](#). Meant to be used with 0 temperature.

---

```
input: ) [ { } ] ( { } ) [ ( { } ) ] } {
input wriritten as a sequence of symbols:
s= ')', '[', '{', '}', ']', '(', '{', '}', ')', '[',
'(', '{', '}', ']', '}', '}', '{'
length(s)= 17
stack is initialized as empty
i=0
there is nothing in stack, so push s(0)= ')' on stack
stack= )
are the last two symbols an open and a closed
parenthesis of the same type? No. Stack stays same.
i=1
we push s(1)='[' on the stack
stack= ) [
are the last two symbols an open and a closed
parenthesis of the same type? No. Stack stays same.
i=2
we push s(2)='{' to the stack
stack= ) [ {
are the last two symbols an open and a closed
parenthesis of the same type? No. Stack stays same.
i=3
we push s(3)='}' to the stack
stack= ) [ { }
are the last two symbols an open and a closed
parenthesis of the same type? Yes, they are { },
opening then closing.
We pop the last two symbols from the stack.
stack= ) [
i=4
we push s(4)=']' to the stack
stack= ) [ ]
are the last two symbols an open and a closed
parenthesis of the same type? Yes, they are [ ],
opening then closing.
We pop the last two symbols from the stack
stack= )
i=5
we push s(5)='(' to the stack
stack= ) (
...

i=15
we push s(15)='}' to the stack
stack= ) }
are the last two symbols an open and a closed
parenthesis of the same type? No. Stack stays same.
i=16
we push s(16)='{' to the stack
stack= ) } {
are the last two symbols an open and a closed
parenthesis of the same type? No. Stack stays same.
i=17
we have reached the end of the input string.
If the stack has some parenthesis left in it,
the sequence is invalid, otherwise,
if the stack is empty, it is valid.
Sequence is: invalid
END

input:
```

---

---

**Prompt A.7.** A prompt (white background) for translating logical deduction puzzles from BIG-bench into a Wolfram language (Mathematica) call. The response from GPT-3 Codex is shown green-shaded. [Playground link \(use 0 temperature\)](#)

---

Puzzle: The following objects need to be ordered. obj1 is the biggest. obj2 is smaller than obj3. obj1 is bigger than obj2.

Question: Which object is the biggest?

Parsing step:

Items: obj1, obj2, obj3  
Number of items: 3  
Statement 1: obj1 is the biggest.  
Statement 2: obj2 is smaller than obj3.  
Statement 3: obj1 is bigger than obj2.

Scoring identification step:

Scores will refer to size.  
Since we have 3 items, let's assume that the biggest gets a score of 3 pounds and the smallest gets the score of 1 pound.

Translation step:

Available variable names: x, y, z, a, b, c  
Map item scores of 'obj1', 'obj2', 'obj3' to variable names x, y, z  
obj1 score is x; obj2 score is y; obj3 is z;  
Statement 1: 'x' is the biggest.  
Statement 2: 'y' is smaller than 'z'.  
Statement 3: 'x' is bigger than 'y'.  
Domain constraints:  $1 < x <= 3$ ,  $1 < y <= 3$ ,  $1 < z <= 3$   
Statements as a set of inequalities or equalities:  $x = 3$ ,  $y < z$ ,  $x > y$   
All variables are different:  $x \neq y$ ,  $x \neq z$ ,  $y \neq z$

Call to WolframAlpha:

```
Solve[{1<x<=3, 1<y<=3, 1<z<=3, x==3, y<z, x>y, x!=y, x!=z, y!=z }, {x, y, z}, Integers]
```

END

Puzzle: A fruit stand sells five fruits: kiwis, pears, peaches, loquats, and apples. The loquats are more expensive than the kiwis. The pears are more expensive than the peaches. The apples are more expensive than the loquats. The apples are less expensive than the peaches.

Question: Which is the most expensive?

Parsing step:

Items: kiwis, pears, peaches, loquats, apples  
Number of items: 5  
Statement 1: The loquats are more expensive than the kiwis.  
Statement 2: The pears are more expensive than the peaches.  
Statement 3: The apples are more expensive than the loquats.  
Statement 4: The apples are less expensive than the peaches.

Scoring identification step:

Scores will refer to price.  
Since we have 5 items, let's assume that the most expensive gets a score of 5 dollars and the least expensive gets the score of 1 dollar.

Translation step:

Available variable names: x, y, z, a, b, c  
Map item scores of 'kiwis', 'pears', 'peaches', 'loquats', 'apples' to variable names x, y, z, a, b  
kiwis score is x; pears score is y; peaches is z; loquats is a; apples is b;  
Statement 1: 'a' is more expensive than 'x'.  
Statement 2: 'y' is more expensive than 'z'.  
Statement 3: 'b' is more expensive than 'a'.  
Statement 4: 'b' is less expensive than 'z'.  
Domain constraints:  $1 < x <= 5$ ,  $1 < y <= 5$ ,  $1 < z <= 5$ ,  $1 < a <= 5$ ,  $1 < b <= 5$   
Statements as a set of inequalities or equalities:  $a > x$ ,  $y > z$ ,  $b > a$ ,  $b < z$   
All variables are different:  $x \neq y$ ,  $x \neq z$ ,  $x \neq a$ ,  $x \neq b$ ,  $y \neq z$ ,  $y \neq a$ ,  $y \neq b$ ,  $z \neq a$ ,  $z \neq b$ ,  $a \neq b$

Call to WolframAlpha:

```
Solve[{1<x<=5, 1<y<=5, 1<z<=5, 1<a<=5, 1<b<=5, a>x, y>z, b>a, b<z, x!=y, x!=z, x!=a, x!=b, y!=z, y!=a, y!=b, z!=a, z!=b, a!=b}, {x, y, z, a, b}, Integers]
```

---

**Prompt A.8.** A zero-shot code prompt (white background) which, when temperature is carefully chosen may trigger code execution (shaded green) by Codex. Although the sequence gets sorted, the execution goes awry after that. Importantly, the number of swaps is not tracked, even though the code contains appropriate instructions. In contrast, IRSA prompts consistently and repeatedly trigger correct program execution. See also Prompts [A.11](#) and [A.12](#) for examples of inconsistent behaviour of GPT-4 with zero-shot code prompting.

---

# Here is the code for Bubble Sort algorithm that keeps track of the number of needed swaps:

```
def bubbleSort(arr):
    n = len(arr)
    # initiate the number of swaps to 0
    n_swaps=0;
    # Traverse through all array elements
    for i in range(n):

        # Last i elements are already in place
        for j in range(0, n-i-1):

            # traverse the array from 0 to n-i-1
            # Swap if the element found is greater
            # than the next element
            if arr[j] > arr[j+1] :
                arr[j], arr[j+1] = arr[j+1], arr[j]
                n_swaps = n_swaps+1
```

Problem: 8, 7, 6, 4, 9

EXECUTION:

```
i=0
j=0
8 > 7
7, 8, 6, 4, 9
j=1
8 > 6
7, 6, 8, 4, 9
j=2
8 > 4
7, 6, 4, 8, 9
j=3
8 > 9
7, 6, 4, 8, 9
j=4
i=1
j=0
7 > 6
6, 7, 4, 8, 9
j=1
7 > 4
6, 4, 7, 8, 9
j=2
7 > 8
6, 4, 7, 8, 9
j=3
i=2
j=0
6 > 4
4, 6, 7, 8, 9
j=1
6 > 7
4, 6, 7, 8, 9
j=2
i=3
j=0
4 > 6
4, 6, 7, 8, 9
j=1
i=4
j=0
i=5
j=0
i=6
j=0
i=7
j=0
i=8
...
```

---

**Prompt A.9.** An example of a baseline prompt design. Prompts with and without the code, shaded in gray, were used. Zero shot prompts omitted the examples, also shaded in gray. Other than the (buggy) algorithm we adopted for the logical deduction puzzle, the algorithms we tested are known to Codex, and we based the codes used in the prompts on the ones generated by Codex itself.

---

```
# Python3 program to find the length
# of the longest substring
# without repeating characters in string s
# the maximum length of such a substring will be returned in m_len
```

```
def longestUniqueSubsttr(s):
    # last index of every character
    last_idx = {}
    m_len = 0
    # starting index of current
    # window to calculate m_len
    start_idx = 0
    for i in range(0, len(s)):
        # Find the last index of str[i]
        # Update start_idx (starting index of current window)
        # as maximum of current value of start_idx and last
        # index plus 1
        if s[i] in last_idx:
            start_idx = max(start_idx, last_idx[s[i]] + 1)

        # Update result if we get a larger window
        m_len = max(m_len, i-start_idx + 1)
        # Update last index of current char.
        last_idx[s[i]] = i
    return m_len
```

What would the algorithm above, which looks for the longest substring with non repeating characters compute for a given problem? Use this format:

```
Input: s = ...
START
The solution is: m_len= ...
END
```

```
Input: s = a, a, c, a, d, b, b
START
The solution is: m_len=4
END
```

```
Input: s = b, b, a, a, d, b, b
START
The solution is: m_len=3
END
```

```
Input: s = c, a, d, c, b, c, a
START
The solution is: m_len=4
END
```

```
Input: s = a, c, b, a, c, d, d
START
The solution is: m_len=4
END
```

```
Input: s = b, b, d, d, a, d, b
START
The solution is: m_len=3
END
```

```
Input: s = a, c, d, c, a, c, a
START
```

---

---

**Prompt A.10.** Given the non-shaded text as a prompt, GPT-4 (0 temperature) returns the green shaded response.

---

We need to compute the longest common subsequence for two sequences

```
s1=bccba
s2=ccaa
```

using the dynamic programming algorithm. Show the python code for the algorithm, and then execute it. Finally, output the length of the longest common subsequence bracketed with <answer> and </answer>.

Here's the Python code for the dynamic programming algorithm to find the longest common subsequence:

```
'''python
def longest_common_subsequence(s1, s2):
    m = len(s1)
    n = len(s2)
    dp = [[0] * (n + 1) for _ in range(m + 1)]

    for i in range(1, m + 1):
        for j in range(1, n + 1):
            if s1[i - 1] == s2[j - 1]:
                dp[i][j] = dp[i - 1][j - 1] + 1
            else:
                dp[i][j] = max(dp[i - 1][j], dp[i][j - 1])

    return dp[m][n]

s1 = "bccba"
s2 = "ccaa"
lcs_length = longest_common_subsequence(s1, s2)
print(f"<answer>{lcs_length}</answer>")
'''
```

Now, let us execute the code and find the length of the longest common subsequence:

```
'''python
s1 = "bccba"
s2 = "ccaa"
lcs_length = longest_common_subsequence(s1, s2)
print(f"<answer>{lcs_length}</answer>")
'''
```

Output:

```
'''
<answer>3</answer>
'''
```

---

**Prompt A.11.** Given the non-shaded text as a prompt, GPT-4 (0 temperature) returns the green shaded response. The prompt attempts to trigger tracking steps of program execution, but only the initial and final matrix are shown.

---

We need to compute the longest common subsequence for two sequences

```
s1=bccba
s2=ccaa
```

using the dynamic programming algorithm. Show the python code for the algorithm, and then write down its execution with intermediate steps. Finally, output the length of the longest common subsequence bracketed with <answer> and </answer>.

Here's the Python code for the dynamic programming algorithm to find the longest common subsequence:

```
'''python
def longest_common_subsequence(s1, s2):
    m = len(s1)
    n = len(s2)
    dp = [[0] * (n + 1) for _ in range(m + 1)]

    for i in range(1, m + 1):
        for j in range(1, n + 1):
            if s1[i - 1] == s2[j - 1]:
                dp[i][j] = dp[i - 1][j - 1] + 1
            else:
                dp[i][j] = max(dp[i - 1][j], dp[i][j - 1])

    return dp[m][n]

s1 = "bccba"
s2 = "ccaa"
print(longest_common_subsequence(s1, s2))
'''
```

Now let us go through the execution with intermediate steps:

1. Initialize the 'dp' table with dimensions (m+1) x (n+1), where m and n are the lengths of s1 and s2, respectively. The table will look like this:

```
0 0 0 0 0
0 0 0 0 0
0 0 0 0 0
0 0 0 0 0
0 0 0 0 0
0 0 0 0 0
```

2. Iterate through the table, comparing characters from s1 and s2. Update the table based on the dynamic programming formula:

```
0 0 0 0 0
0 0 1 1 1
0 1 1 1 1
0 1 2 2 2
0 1 2 2 2
0 1 2 2 3
```

3. The length of the longest common subsequence is in the bottom-right cell of the table, which is 3.

So, the length of the longest common subsequence is <answer>3</answer>.



**Prompt A.12.** Given the same non-shaded text as in Prompt [A.11](#) as a prompt, **just for a different input**, GPT-4 (0 temperature) returns the green shaded response that this time does list more (but not all!) intermediate steps. This style of prompting GPT-4 reaches accuracy of 69% on LCS-S, compared to 93% achieved with IRSA in GPT-3.

We need to compute the longest common subsequence for two sequences

```
s1=aaca
s2=abab
```

using the dynamic programming algorithm. Show the python code for the algorithm, and then write down its execution with intermediate steps. Finally, output the length of the longest common subsequence bracketed with <answer> and </answer>.

Here is the Python code for the dynamic programming algorithm to compute the longest common subsequence:

```
'''python
def longest_common_subsequence(s1, s2):
    m = len(s1)
    n = len(s2)

    dp = [[0]*(n+1) for _ in range(m+1)]

    for i in range(m+1):
        for j in range(n+1):
            if i == 0 or j == 0:
                dp[i][j] = 0
            elif s1[i-1] == s2[j-1]:
                dp[i][j] = dp[i-1][j-1] + 1
            else:
                dp[i][j] = max(dp[i-1][j], dp[i][j-1])

    return dp[m][n]
```

```
s1 = "aaca"
s2 = "abab"
result = longest_common_subsequence(s1, s2)
print(result)
'''
```

Here is the execution with intermediate steps:

1. Initialize the 'dp' table with dimensions (m+1) x (n+1). For the given sequences, it will look like:

```
0 0 0 0 0
0 0 0 0 0 0
0 0 0 0 0 0
0 0 0 0 0 0
0 0 0 0 0 0
```

2. Fill in the 'dp' table by iterating through each cell and apply the algorithm rules:

```
For i, j = 1, 1: s1[i-1] != s2[j-1], so dp[i][j] = max(dp[i-1][j], dp[i][j-1]) = max(0, 0) = 0
0 0 0 0 0
0 0 0 0 0 0
0 0 0 0 0 0
0 0 0 0 0 0
0 0 0 0 0 0
```

```
For i, j = 1, 2: s1[i-1] != s2[j-1], so dp[i][j] = max(dp[i-1][j], dp[i][j-1]) = max(0, 0) = 0
0 0 0 0 0
0 0 0 0 0 0
0 0 0 0 0 0
0 0 0 0 0 0
0 0 0 0 0 0
```

```
For i, j = 1, 3: s1[i-1] == s2[j-1], so dp[i][j] = dp[i-1][j-1] + 1 = 0 + 1 = 1
0 0 0 0 0
0 0 0 0 0 0
0 0 0 1 0 0
0 0 0 0 0 0
0 0 0 0 0 0
```

Continue filling in the table with the same rules:

```
0 0 0 0 0
0 0 0 0 0 0
0 0 0 1 0 0
0 0 1 1 1 0
0 0 1 1 2 0
```

3. The value in the bottom-right cell contains the length of the longest common subsequence:

<answer>2</answer>
